# Supplementary material
Source: publisher figshare collection journal article supplement (https://gsapubs.figshare.com/ndownloader/files/22758368)
Supplement: Supplementary file 1 [file 22758368]

## Supplementary Information

## A modern iron isotope perspective on the redox evolution of ancient oceans

Silke Severmann, Timothy W. Lyons, Ariel Anbar, James McManus & Gwyneth Gordon

### Materials and methods

#### 1) Sample descriptions

The samples used in this study were collected during the 1988 *R/V Knorr* Black Sea cruise. The exact locations, sedimentology and geochemistry are described in detail elsewhere (Lyons, 1991; Lyons and Berner, 1992; Lyons et al., 1993; Anderson et al., 1994; Canfield et al., 1996; Lyons, 1997; Hurtgen et al., 1999). Cores from the central euxinic basin (stations 9 and 14, >2000 m) consist entirely of microlaminated, coccolith-rich *Unit 1* mud [using the nomenclature of Ross et al. (1970)]. Organic carbon and calcium carbonate concentrations in these euxinic sediment average  $5.3 \pm 1.0$  and  $52.5 \pm 11.3$  ( $\pm 1s$ ) wt.%, respectively. Pyrites in this unit are present dominantly as fine-grained framboidal aggregates, which indicates that they formed syngenetically in the water column (Wilkin and Arthur, 2001).

Stations 3, 4, 16, and 17 were on the shallow oxic shelf, where sediments are characterized by high degrees of bioturbation. Below the surface interval, organic carbon and calcium carbonate concentrations at the four shallow stations collectively average  $1.3 \pm 0.4$  and  $20.1 \pm 5.3$  wt.%, respectively. The shallower Black Sea sediments contain an increasing proportion of fine-grained euhedral pyrite, which is more typical of diagenetic pyrite formation within the sediments (Wilkin and Arthur, 2001). Sedimentation rates for Unit 1 sediments have been estimated as roughly 15 to 20 cm/kyr (Calvert and Karlin, 1991; Crusius and Anderson, 1992; Arthur et al., 1994; Jones and Gagnon, 1994). Rates at stations 3, 16 and 17 range between 60 and 90 cm/kyr (Anderson et al., 1994; data are unavailable for Station 4).

## 29 2) Sample preparation and analysis

30 For analysis of total iron isotope compositions, ~0.1 g of dried sediment was fully  
 31 dissolved using a mixture of HNO<sub>3</sub>, HClO<sub>3</sub> and HF. For determination of pyrite isotope  
 32 composition we used a chemical leaching procedure modified after Huerta-Diaz and  
 33 Morse (1992). Briefly, ~0.5 g of dry sediment was extracted in concentrated boiling HCl  
 34 for 1 min. The residue was treated with two sequential HF extractions (30 ml 10M HF for  
 35 1 hr, then 30 ml 10M HF for 16 hrs) to dissolve any remaining silicate phases. The only  
 36 significant iron phase remaining after this treatment is pyrite, which was extracted in 10  
 37 ml of concentrated HNO<sub>3</sub> for 2 hrs. All extractions were performed at room temperature  
 38 under constant shaking. Chemically extracted pyrite-Fe was dried down repeatedly in  
 39 concentrated HNO<sub>3</sub> and H<sub>2</sub>O<sub>2</sub> to break down any residual organic carbon. Dry residue  
 40 was dissolved in 7M HCl, and ~100 µg of iron was purified on Bio-Rad AG1X8 anion  
 41 resin (~250 µl volume) following the procedure of Beard et al. (2003). Column yields  
 42 were carefully monitored by *Ferrozine* analysis of each sample before and after chemical  
 43 processing, and only samples that had ≥95% recovery were used for iron isotope analysis.

44 Iron isotope analysis was performed on a ThermoFinnigan *Neptune* multi-  
 45 collector inductively coupled plasma mass-spectrometer (MC-ICP-MS) at Arizona State  
 46 University, following the method of Arnold et al. (2004). Samples were introduced as 2  
 47 ppm or 3 ppm solutions through a desolvating nebulizer. The analysis was performed in  
 48 medium mass resolution mode (mass resolving power of 8000-9000). Mass bias during  
 49 the analysis was corrected by using a Cu elemental spike, which was added to the  
 50 purified samples to a concentration matching that of the Fe concentration. In addition,  
 51 sample isotope ratios were normalized to the average of two bracketing standards as an  
 52 additional correction for instrumental mass discrimination. <sup>53</sup>Cr, <sup>54</sup>Fe, <sup>56</sup>Fe, <sup>57</sup>Fe, <sup>58</sup>Fe,  
 53 <sup>60</sup>Ni, <sup>63</sup>Cu and <sup>65</sup>Cu were measured in dynamic mode, where masses 53 to 60 were  
 54 measured during the first integration and the two Cu isotopes were measured during the  
 55 second integration.

56 Several standard reference materials of known isotope composition, including  
 57 IRMM-014, were measured routinely for each sample batch. In addition, we measured  
 58 gravimetric standards, which were prepared by adding a known amount of enriched <sup>54</sup>Fe  
 59 tracer (97.7% purity, Oak Ridge National Lab) to IRMM-014 standard. Of the 64 samples

analyzed in this study, 15 were processed through duplicate chemical treatment, including sample dissolution or pyrite-Fe extraction and chromatographic extraction. Data are reported in per mil (‰)  $\delta$  notation using the  $^{56}\text{Fe}/^{54}\text{Fe}$  sample ratio relative to the average of igneous rocks ( $\delta^{56}\text{Fe}$ ), which have a  $\delta^{56}\text{Fe}$  of  $0.00 \pm 0.05$  ‰ (Beard et al., 2003). On this scale, the IRMM-014 standard has  $\delta^{56}\text{Fe} = -0.09$  ‰. Replicate analyses were made on different days, and errors for samples with  $\geq 2$  repeat analyses are reported as two standard deviations (2-SD). The average external 2-SD reproducibility, as determined by duplicate analysis via re-processing of several powdered samples through chemistry, is  $\pm 0.06$  ‰ for  $\delta^{56}\text{Fe}$  and  $\pm 0.07$  ‰ for  $\delta^{57}\text{Fe}$ .

The iron isotope fractionation between coexisting phases A and B is described by

$$\Delta^{56}\text{Fe}_{\text{A-B}} = \delta^{56}\text{Fe}_{\text{A}} - \delta^{56}\text{Fe}_{\text{B}} \approx 10^3 \ln \alpha_{\text{A-B}}, \quad (\text{E1})$$

where  $\alpha_{\text{A-B}}$  is the isotope fractionation factor in terms of  $^{56}\text{Fe}/^{54}\text{Fe}$  ratios.

The isotope composition of the benthic export flux  $\delta^{56}\text{Fe}_{\text{Ex}}$  may be calculated using the iron isotope composition of either  $\text{Fe}_{\text{T}}$  or  $\text{Fe}_{\text{Py}}$ :

$$\delta^{56}\text{Fe}_{\text{Ex}} = (\delta^{56}\text{Fe}_{\text{T}} * [\text{Fe}_{\text{T}}]) / [\text{Fe}_{\text{Ex}}] \quad (\text{E2})$$

or

$$\delta^{56}\text{Fe}_{\text{Ex}} = (\delta^{56}\text{Fe}_{\text{Py}} * [\text{Fe}_{\text{Py}}]) / [\text{Fe}_{\text{Ex}}], \quad (\text{E3})$$

where  $[\text{Fe}_{\text{Ex}}]$  denote concentrations of the individual iron pools. Benthic export iron flux is assumed to be quantitatively converted to pyrite, and concentrations of the exported iron component in the sediments are calculated as

$$[\text{Fe}_{\text{Ex}}] = [\text{Fe}_{\text{T}}] - [\text{Al}] * 0.6, \quad (\text{E4})$$

where 0.6 is the  $\text{Fe}_{\text{T}}/\text{Al}$  ratio for the lithogenic baseline. This ratio represents the highest ratio measured for sediments from the oxic shelf (Station 17, mean  $\text{Fe}_{\text{T}}/\text{Al} = 0.60$ , see Table S1) and is higher than the commonly used  $\text{Fe}_{\text{T}}/\text{Al}$  ratio for average shale of 0.5 (Taylor and McLennan, 1985). Shuttling of reactive Fe from the shelf sediments to the deep basin causes a decrease of the  $\text{Fe}_{\text{T}}/\text{Al}$  ratio, suggesting that our elevated ratios are not due to post-depositional modification of the detrital material, but rather that they

87 reflect a local lithogenic  $\text{Fe}_T/\text{Al}$  baseline for the Black Sea that deviates from the  
88 generally accepted global average (Lyons and Severmann, 2006). Probably the best  
89 approach to derive an estimate of the  $\text{Fe}_T/\text{Al}$  baseline would be to measure the  
90 composition of particles from the zone of estuarine mixing, since riverine particles  
91 undergo some modification during passage through the estuary (Poulton and Raiswell,  
92 2005). In the absence of a direct measure of the  $\text{Fe}_T/\text{Al}$  ratio for the local terrestrial  
93 particulate input, we assume that our highest measured sediment  $\text{Fe}_T/\text{Al}$  ratios best  
94 represent a lithogenic baseline value for the Black Sea, although we recognize that this is  
95 not ideal. We note, however, that the choice of the  $\text{Fe}_T/\text{Al}$  baseline as well as its isotope  
96 composition does not affect our principal observation, which is the systematic decrease in  
97 iron isotope compositions from the shelf sediments to the deep basin sediments and their  
98 inverse relationship with  $\text{Fe}_T/\text{Al}$  ratios (Fig. 3).

Table S1: Iron and aluminum concentrations, and iron isotope compositions of Black Sea sediments.

| Depth<br>(cm)                       | Depositional setting | Fe <sub>T</sub><br>(wt. %) | Al<br>(wt. %) | Fe/Al | Fe <sub>PV</sub><br>(wt. %) | δ <sup>56</sup> Fe <sub>T</sub><br>(‰) | 2-SD  | δ <sup>57</sup> Fe <sub>T</sub><br>(‰) | 2-SD  | n <sup>1</sup> | δ <sup>56</sup> Fe <sub>PV</sub><br>(‰) | 2-SD  | δ <sup>57</sup> Fe <sub>PV</sub><br>(‰) | 2-SD  | n <sup>1</sup> | δ <sup>56</sup> Fe <sub>Ex</sub><br>(from Fe <sub>PV</sub> ) | δ <sup>56</sup> Fe <sub>Ex</sub><br>(from Fe <sub>T</sub> ) |
|-------------------------------------|----------------------|----------------------------|---------------|-------|-----------------------------|----------------------------------------|-------|----------------------------------------|-------|----------------|-----------------------------------------|-------|-----------------------------------------|-------|----------------|--------------------------------------------------------------|-------------------------------------------------------------|
| <b>Station 16 (129m)</b>            |                      |                            |               |       |                             |                                        |       |                                        |       |                |                                         |       |                                         |       |                |                                                              |                                                             |
| 0-2                                 | oxic                 | 2.76                       | 5.07          | 0.54  | 0.01                        | 0.08                                   | ±0.12 | 0.11                                   | ±0.14 | 2              | -0.54                                   | ±0.04 | -0.71                                   | ±0.28 | 2+2            |                                                              |                                                             |
| 4-6                                 | oxic                 | 2.61                       | 5.07          | 0.51  | 0.03                        | 0.15                                   | ±0.06 | 0.20                                   | ±0.02 | 2              | -1.07                                   | ±0.02 | -1.56                                   | ±0.10 | 3              |                                                              |                                                             |
| 6-8                                 | oxic                 | 3.15                       | 5.79          | 0.54  | 0.08                        | 0.08                                   | ±0.06 | 0.10                                   | ±0.06 | 3+2            | -1.17                                   |       | -1.76                                   |       | 1              |                                                              |                                                             |
| 8-10                                | oxic                 | 2.90                       | 5.62          | 0.52  | 0.10                        | 0.12                                   | ±0.07 | 0.22                                   | ±0.02 | 2              | -1.13                                   | ±0.09 | -1.66                                   | ±0.01 | 3              |                                                              |                                                             |
| 10-12                               | oxic                 | 3.12                       | 5.80          | 0.54  | 0.08                        | 0.03                                   | ±0.07 | 0.04                                   | ±0.10 | 2+2            | -1.00                                   |       | -1.51                                   |       | 1              |                                                              |                                                             |
| 12-14                               | oxic                 | 2.89                       | 5.68          | 0.51  | 0.10                        | 0.12                                   | ±0.10 | 0.20                                   | ±0.03 | 3              | -0.99                                   | ±0.08 | -1.43                                   | ±0.07 | 2              |                                                              |                                                             |
| 14-16                               | oxic                 | 3.11                       | 5.79          | 0.54  | 0.09                        | 0.06                                   | ±0.02 | 0.08                                   | ±0.08 | 2+2            | -0.93                                   |       | -1.40                                   |       | 1              |                                                              |                                                             |
| 16-18                               | oxic                 | 3.20                       | 5.78          | 0.55  | 0.11                        | 0.09                                   | ±0.01 | 0.13                                   | ±0.01 | 2+2            | -1.02                                   |       | -1.56                                   |       | 1              |                                                              |                                                             |
| <b>Station 17 (97m)</b>             |                      |                            |               |       |                             |                                        |       |                                        |       |                |                                         |       |                                         |       |                |                                                              |                                                             |
| 0-2                                 | oxic                 | 3.77                       | 6.13          | 0.62  | 0.01                        | 0.04                                   | ±0.05 | 0.08                                   | ±0.08 | 2              | -0.41                                   | ±0.06 | -0.52                                   | ±0.06 | 2              |                                                              |                                                             |
| 2-4                                 | oxic                 | 4.00                       | 6.30          | 0.63  | 0.01                        | 0.01                                   | ±0.09 | 0.02                                   | ±0.11 | 2+2            | -0.54                                   |       | -0.71                                   |       | 1              |                                                              |                                                             |
| 4-6                                 | oxic                 | 3.79                       | 6.37          | 0.59  | 0.01                        | 0.05                                   | ±0.04 | 0.05                                   | ±0.01 | 2              |                                         |       |                                         |       | 1              |                                                              |                                                             |
| 6-8                                 | oxic                 | 3.68                       | 6.16          | 0.60  | 0.02                        | 0.05                                   | ±0.07 | 0.06                                   | ±0.13 | 2              | -0.87                                   |       | -1.26                                   |       | 1              |                                                              |                                                             |
| 8-10                                | oxic                 | 3.49                       | 6.03          | 0.58  | 0.03                        | 0.03                                   | ±0.02 | 0.06                                   | ±0.03 | 2              | -0.94                                   |       | -1.37                                   |       | 1              |                                                              |                                                             |
| 10-12                               | oxic                 | 3.44                       | 5.98          | 0.58  | 0.08                        | 0.05                                   | ±0.02 | 0.07                                   | ±0.04 | 2              | -1.28                                   |       | -1.87                                   |       | 1              |                                                              |                                                             |
| 12-14                               | oxic                 | 3.80                       | 6.31          | 0.60  | 0.16                        | 0.01                                   | ±0.00 | 0.02                                   | ±0.02 | 2              | -1.19                                   | ±0.14 | -1.89                                   | ±0.60 | 1              |                                                              |                                                             |
| 14-16                               | oxic                 | 3.56                       | 5.73          | 0.62  | 0.21                        | 0.10                                   | ±0.13 | 0.12                                   | ±0.04 | 2+1            | -1.16                                   | ±0.10 | -1.71                                   | ±0.05 | 2              |                                                              |                                                             |
| <b>Station 3 (85m)</b>              |                      |                            |               |       |                             |                                        |       |                                        |       |                |                                         |       |                                         |       |                |                                                              |                                                             |
| 0-2                                 | oxic                 | 3.08                       | 6.08          | 0.51  | 0.06                        | 0.04                                   | ±0.01 | 0.05                                   | ±0.02 | 2              |                                         |       |                                         |       |                |                                                              |                                                             |
| 2-4                                 | oxic                 | 3.27                       | 6.64          | 0.49  | 0.13                        | 0.08                                   | ±0.05 | 0.13                                   | ±0.03 | 2              |                                         |       |                                         |       |                |                                                              |                                                             |
| 6-8                                 | paleo-chemocline     | 4.75                       | 5.95          | 0.80  | 2.79                        | -0.37                                  | ±0.09 | -0.53                                  | ±0.11 | 2+1            |                                         |       |                                         |       |                |                                                              | -1.38                                                       |
| 8-10                                | paleo-chemocline     | 5.08                       | 6.52          | 0.78  | 2.83                        | -0.21                                  | ±0.03 | -0.31                                  | ±0.01 | 2              |                                         |       |                                         |       |                |                                                              | -0.88                                                       |
| <b>Station 4 (115m)</b>             |                      |                            |               |       |                             |                                        |       |                                        |       |                |                                         |       |                                         |       |                |                                                              |                                                             |
| 0-2                                 | oxic                 | 3.04                       | 6.49          | 0.47  | 0.08                        | 0.07                                   | ±0.01 | 0.08                                   | ±0.08 | 2              |                                         |       |                                         |       |                |                                                              |                                                             |
| 2-4                                 | oxic                 | 2.93                       | 6.33          | 0.46  | 0.08                        | 0.08                                   | ±0.01 | 0.11                                   | ±0.02 | 2              |                                         |       |                                         |       |                |                                                              |                                                             |
| 8-10                                | paleo-chemocline     | 4.15                       | 5.65          | 0.73  | 2.00                        | -0.22                                  | ±0.01 | -0.35                                  | ±0.03 | 2              |                                         |       |                                         |       |                |                                                              | -1.15                                                       |
| 10-12                               | paleo-chemocline     | 4.12                       | 5.49          | 0.75  | 2.10                        | -0.13                                  | ±0.01 | -0.23                                  | ±0.03 | 2              |                                         |       |                                         |       |                |                                                              | -0.58                                                       |
| <b>Station 9 (2094m)</b>            |                      |                            |               |       |                             |                                        |       |                                        |       |                |                                         |       |                                         |       |                |                                                              |                                                             |
| 4-6                                 | euxinic              | 2.19                       | 2.64          | 0.83  | 1.24                        | -0.34                                  | ±0.13 | -0.44                                  | ±0.12 | 2              | -0.74                                   | ±0.16 | -1.10                                   | ±0.11 | 5              | -1.48                                                        | -1.18                                                       |
| 8-10                                | euxinic              | 2.41                       | 2.66          | 0.91  | 1.43                        | -0.06                                  | ±0.08 | -0.06                                  | ±0.15 | 3              | -0.76                                   | ±0.01 | -1.14                                   | ±0.02 | 2              | -1.31                                                        | -0.16                                                       |
| 14-16                               | euxinic              | 0.95                       | 0.94          | 1.01  | 0.61                        | -0.34                                  | ±0.09 | -0.45                                  | ±0.14 | 4              | -0.80                                   | ±0.11 | -1.23                                   | ±0.07 | 3+2            | -1.25                                                        | -0.80                                                       |
| 16-18                               | euxinic              | 2.01                       | 1.96          | 1.02  | 1.31                        | -0.34                                  | ±0.07 | -0.49                                  | ±0.05 | 3              | -0.82                                   | ±0.04 | -1.22                                   | ±0.05 | 2+1            | -1.28                                                        | -0.80                                                       |
| 24-26                               | euxinic              | 1.45                       | 1.39          | 1.04  | 0.99                        | -0.24                                  | ±0.05 | -0.37                                  | ±0.08 | 2+2            | -0.64                                   | ±0.12 | -0.97                                   | ±0.19 | 2+2            | -1.01                                                        | -0.53                                                       |
| <b>Station 14 (2218m)</b>           |                      |                            |               |       |                             |                                        |       |                                        |       |                |                                         |       |                                         |       |                |                                                              |                                                             |
| 0-2                                 | euxinic              | 2.64                       | 4.43          | 0.60  | 1.06                        | -0.13                                  | ±0.15 | -0.15                                  | ±0.22 | 2              | -0.72                                   | ±0.13 | -1.03                                   | ±0.09 | 4              | (42.11)                                                      | (20.89)                                                     |
| 4-6                                 | euxinic              | 2.69                       | 3.86          | 0.70  | 1.26                        | -0.15                                  |       | -0.20                                  |       | 1              | -0.65                                   | ±0.06 | -1.03                                   | ±0.01 | 2              | -2.19                                                        | -1.02                                                       |
| 8-10                                | euxinic              | 1.64                       | 2.12          | 0.77  | 0.87                        | -0.21                                  |       | -0.27                                  |       | 1              | -0.71                                   | ±0.07 | -1.07                                   | ±0.11 | 3              | -1.64                                                        | -0.91                                                       |
| 10-12                               | euxinic              | 1.27                       | 1.59          | 0.80  | 0.68                        | -0.24                                  | ±0.02 | -0.37                                  | ±0.00 | 2              |                                         |       |                                         |       |                |                                                              | -0.93                                                       |
| 12-14                               | euxinic              | 2.51                       | 3.34          | 0.75  | 1.17                        | -0.34                                  | ±0.09 | -0.57                                  | ±0.06 | 2              | -0.72                                   | ±0.12 | -1.12                                   | ±0.14 | 2+2            | -1.63                                                        | -1.62                                                       |
| 14-16                               | euxinic              | 2.19                       | 2.76          | 0.79  | 1.10                        | -0.22                                  | ±0.02 | -0.33                                  | ±0.05 | 2              |                                         |       |                                         |       |                |                                                              | -0.85                                                       |
| 16-18                               | euxinic              | 2.47                       | 3.36          | 0.73  | 1.25                        | -0.13                                  |       | -0.15                                  |       | 1              | -0.78                                   | ±0.09 | -1.18                                   | ±0.16 | 1+1            | -2.12                                                        | -0.68                                                       |
| 18-20                               | euxinic              | 1.81                       | 2.39          | 0.76  | 0.85                        | -0.18                                  | ±0.00 | -0.28                                  | ±0.01 | 2              |                                         |       |                                         |       |                |                                                              | -0.84                                                       |
| 20-22                               | euxinic              | 1.84                       | 2.34          | 0.79  | 0.67                        | -0.22                                  | ±0.03 | -0.36                                  | ±0.03 | 2              |                                         |       |                                         |       |                |                                                              | -0.89                                                       |
| 22-24                               | euxinic              | 2.28                       | 3.40          | 0.67  | 0.85                        | -0.17                                  | ±0.04 | -0.26                                  | ±0.06 | 2+2            |                                         |       |                                         |       |                |                                                              | -1.56                                                       |
| <b>Standard reference materials</b> |                      |                            |               |       |                             |                                        |       |                                        |       |                |                                         |       |                                         |       |                |                                                              |                                                             |
| IRMM-014                            |                      |                            |               |       |                             | -0.09                                  | ±0.03 | -0.36                                  | ±0.26 | 18             |                                         |       |                                         |       |                |                                                              |                                                             |
| BIR-2                               |                      |                            |               |       |                             | -0.04                                  | ±0.03 | -0.28                                  | ±0.27 | 18             |                                         |       |                                         |       |                |                                                              |                                                             |
| Grav IRMM-014 -1ä <sup>2</sup>      |                      |                            |               |       |                             | -1.13                                  | ±0.02 |                                        |       | 17             |                                         |       |                                         |       |                |                                                              |                                                             |
| BHVO-1                              |                      |                            |               |       |                             | 0.03                                   | ±0.04 | -0.15                                  | ±0.05 | 2              |                                         |       |                                         |       |                |                                                              |                                                             |
| Sco-1                               |                      |                            |               |       |                             | -0.01                                  | ±0.01 | -0.20                                  | ±0.06 | 2              |                                         |       |                                         |       |                |                                                              |                                                             |
| SDO-1                               |                      |                            |               |       |                             | -0.05                                  | ±0.12 | -0.27                                  | ±0.10 | 3+2            |                                         |       |                                         |       |                |                                                              |                                                             |
| SGR-1                               |                      |                            |               |       |                             | -0.04                                  | ±0.02 | -0.24                                  | ±0.01 | 2              |                                         |       |                                         |       |                |                                                              |                                                             |
| TAG <sup>3</sup>                    |                      |                            |               |       |                             | -0.99                                  | ±0.09 | -1.64                                  | ±0.16 | 2+3            |                                         |       |                                         |       |                |                                                              |                                                             |

<sup>1</sup> Number of repeat isotope analysis, where multiple entries (e.g. 2+2) indicates that powdered samples were re-processed through entire chemical procedure.<sup>2</sup> Gravimetric standard was made from IRMM-014 and enriched <sup>56</sup>Fe enriched tracer. The true δ<sup>56</sup>Fe of the gravimetric standard is -1ä relative to IRMM-014.<sup>3</sup> In-house standard made from mixed metalliferous hydrothermal sulfide sediments.

## References

- Anderson R. F., Lyons T. W., and Cowie G. L. (1994) Sedimentary record of a shoaling of the oxic/anoxic interface in the Black Sea. *Mar. Geol.* **116**, 373-384.
- Arnold G. L., Weyer S., and Anbar A. D. (2004) Fe isotope variations in natural materials using high mass resolution multiple collector ICPMS. *Anal. Chem.* **76**, 322-327.
- Arthur M. A., Dean W. E., Neff E. D., Hay B. J., King G. M., and Jones A. D. (1994) Varve calibrated records of carbonate and organic carbon accumulation over the last 2000 years in the Black Sea. *Global Biogeochem. Cycles* **8**, 195-217.
- Beard B. L., Johnson C. M., Skulan J. L., Nealson K. H., Sun H., and Cox L. (2003) Application of Fe isotopes to tracing the geochemical and biochemical cycling of Fe. *Chem. Geol.* **195**, 87-117.
- Calvert S. E. and Karlin R. E. (1991) Relationships between sulphur, organic carbon, and iron in the modern sediments of the Black Sea. *Geochim. Cosmochim. Acta* **55**, 2483-2490.
- Canfield D. E., Lyons T. W., and Raiswell R. (1996) A model for iron deposition to euxinic Black Sea sediments. *Am. J. Sci.* **296**, 818-834.
- Crusius J. and Anderson R. F. (1992) Inconsistencies in accumulation rates of Black Sea sediments inferred from records of laminae and <sup>210</sup>Pb. *Paleoceanography* **7**, 215-227.
- Huerta-Diaz M. A. and Morse J. W. (1992) Pyritization of trace metals in anoxic marine sediments. *Geochim. Cosmochim. Acta* **56**, 2681-2702.
- Hurtgen M. T., Lyons T. W., Ingall E. D., and Cruse A. M. (1999) Anomalous enrichments of iron monosulfide in euxinic marine sediments and the role of H<sub>2</sub>S in iron sulfide transformations; examples from Effingham Inlet, Orca Basin, and the Black Sea. *Am. J. Sci.* **299**, 556-588.
- Jones G. A. and Gagnon A. R. (1994) Radiocarbon chronology of Black Sea sediments. *Deep-Sea Res.* **41**, 531-557.
- Lyons T. W. (1991) Upper Holocene sediments of the Black Sea: Summary of Leg 4 box-cores (1988 Black Sea Oceanographic expedition). In *Black Sea Oceanography* (ed. E. Izdar and J. W. Murray), pp. 401-441. Kluwer.
- Lyons T. W. (1997) Sulfur isotope trends and pathways of iron sulfide formation in the upper Holocene sediments of the anoxic Black Sea. *Geochim. Cosmochim. Acta* **61**, 3367-3382.
- Lyons T. W. and Berner R. A. (1992) Carbon-sulfur-iron systematics of the uppermost deep-water sediments of the Black Sea. *Chem. Geol.* **99**, 1-27.
- Lyons T. W. and Severmann S. (2006) A critical look at iron paleoredox proxies based on new insights from modern euxinic marine basins. *Geochim. Cosmochim. Acta* **70**, 5698-5722.
- Lyons T. W., Berner R. A., and Anderson R. F. (1993) Evidence for large pre-industrial perturbations of Black Sea chemocline. *Nature* **365**, 538-540.
- Poulton S. W. and Raiswell R. (2005) Chemical and physical characteristics of iron oxides in riverine and glacial meltwater sediments. *Chem. Geol.* **218**, 203-221.
- Ross D. A., Degens E. T., and MacIlvaine J. (1970) Black Sea: recent sedimentary history. *Science* **170**, 163-165.

- 145 Taylor S. R. and McLennan S. M. (1985) *The Continental Crust: Its Composition and*  
146 *Evolution*. Blackwell.
- 147 Wilkin R. T. and Arthur M. A. (2001) Variations in pyrite texture, sulfur isotope  
148 compositions, and iron systematics in the Black Sea: Evidence for the late  
149 Pleistocene to Holocene excursions of the O<sub>2</sub>-H<sub>2</sub>S redox transitions. *Geochim.*  
150 *Cosmochim. Acta* **65**, 1399-1416.
- 151
- 152
